# Supplementary material
Source: MDPI journal article supplement (https://www.mdpi.com/1424-8247/16/7/932)
Supplement: s1 [file s1]

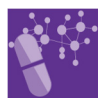

## 1. Supplementary Files/Tables

**Supplementary Table S1.** Population Coverage for CD8 Epitopes

| Region          | Percent Population Coverage (%) |
|-----------------|---------------------------------|
| World           | 98.55                           |
| East Asia       | 98.18                           |
| Northeast Asia  | 94.7                            |
| South Asia      | 94.73                           |
| Southeast Asia  | 94.56                           |
| Southwest Asia  | 92.5                            |
| Europe          | 99.68                           |
| East Africa     | 98.18                           |
| West Africa     | 95.49                           |
| Central Africa  | 86.04                           |
| North Africa    | 96.03                           |
| South Africa    | 93.03                           |
| West Indies     | 98.98                           |
| North America   | 99.06                           |
| Central America | 7.76                            |
| South America   | 88.3                            |
| Oceania         | 94.71                           |

**Supplementary Table S2.** Optimized CD8 Epitopes

| Epitope   | HLA Alleles                                                                                                                                                                                                                 |
|-----------|-----------------------------------------------------------------------------------------------------------------------------------------------------------------------------------------------------------------------------|
| NPMYEVQWK | HLA-A*68:01, HLA-B*35:01, HLA-A*33:01, HLA-B*53:01, HLA-A*11:01, HLA-A*03:01, HLA-B*07:02                                                                                                                                   |
| SNSDINAAI | HLA-A*68:02, HLA-B*51:01, HLA-A*02:06, HLA-B*40:01, HLA-A*30:02, HLA-A*02:03, HLA-A*26:01, HLA-B*07:02, HLA-B*58:01, HLA-A*32:01, HLA-B*44:02, HLA-B*44:03, HLA-A*01:01, HLA-B*53:01, HLA-B*35:01, HLA-A*23:01, HLA-A*24:02 |

|           |                                                                                                                                                                                                                |
|-----------|----------------------------------------------------------------------------------------------------------------------------------------------------------------------------------------------------------------|
| ITKIRDFGL | HLA-B*08:01, HLA-B*57:01, HLA-A*30:01, HLA-B*58:01, HLA-A*68:02, HLA-A*32:01, HLA-A*02:06, HLA-B*07:02, HLA-A*30:02, HLA-B*51:01, HLA-A*02:03, HLA-A*31:01, HLA-B*15:01, HLA-A*33:01, HLA-A*24:02, HLA-A*23:01 |
| GKSDLIVHV | HLA-A*02:06, HLA-A*02:03, HLA-A*68:02, HLA-A*02:01, HLA-B*40:01, HLA-A*30:01, HLA-B*44:03, HLA-B*51:01, HLA-B*44:02, HLA-A*30:02, HLA-A*26:01, HLA-B*15:01                                                     |

**Supplementary Table S3.** Population Coverage for CD4 Epitopes

| Region          | Percent Population Coverage (%) |
|-----------------|---------------------------------|
| World           | 65.14                           |
| East Asia       | 51.04                           |
| Northeast Asia  | 35.03                           |
| South Asia      | 62.22                           |
| Southeast Asia  | 29.2                            |
| Southwest Asia  | 33.7                            |
| Europe          | 71.47                           |
| East Africa     | 47.87                           |
| West Africa     | 43.77                           |
| Central Africa  | 46.34                           |
| North Africa    | 56.01                           |
| South Africa    | 5.91                            |
| West Indies     | 56.3                            |
| North America   | 73.34                           |
| Central America | 44.05                           |
| South America   | 44.84                           |
| Oceania         | 37.6                            |

**Supplementary Table S4.** Optimized CD4 Epitopes

| Epitopes         | HLA Alleles                                          |
|------------------|------------------------------------------------------|
| YGLIKSDASMTVAVKM | HLA-DRB1*04:01, HLA-DRB3*02:02, HLA-DRB1*13:02, HLA- |

|                    |                                                                                                                                                                |
|--------------------|----------------------------------------------------------------------------------------------------------------------------------------------------------------|
|                    | DRB3*01:01, HLA-DRB1*03:01, HLA-DRB1*09:01, HLA-DPA1*02:01, HLA-DRB1*07:01, HLA-DQA1*01:02                                                                     |
| NGNNYVYLDPTQLPY    | HLA-DRB1*04:05, HLA-DRB1*01:01, HLA-DRB1*03:01, HLA-DRB3*01:01, HLA-DRB5*01:01, HLA-DRB1*04:01, HLA-DQA1*05:01, HLA-DQA1*01:01, HLA-DRB1*13:02, HLA-DRB3*02:02 |
| PEILTFDRLVNGMLQ    | HLA-DRB1*09:01, HLA-DRB1*04:05, HLA-DRB1*01:01, HLA-DRB1*11:01, HLA-DPA1*03:01, HLA-DRB1*03:01, HLA-DRB1*15:01                                                 |
| YTFLVSNSDINAAIAFNV | HLA-DQA1*03:01, HLA-DRB3*02:02, HLA-DQA1*01:02, HLA-DRB1*04:05, HLA-DQA1*04:01, HLA-DRB1*09:01, HLA-DRB1*04:01, HLA-DQA1*05:01, HLA-DRB1*13:02                 |
| LTYKYLQNPMYEVQWK   | HLA-DRB1*04:01, HLA-DRB3*02:02, HLA-DRB1*04:05, HLA-DRB1*01:01, HLA-DPA1*01:03, HLA-DRB1*11:01                                                                 |
| FGLARVIKNDNSNYVV   | HLA-DRB1*13:02, HLA-DRB3*02:02, HLA-DRB1*08:02, HLA-DRB1*15:01, HLA-DRB3*01:01, HLA-DRB1*03:01, HLA-DRB1*04:01, HLA-DRB1*11:01, HLA-DRB1*12:01                 |

**Supplementary Table S5.** Population Coverage for Optimized CD4 Epitopes

| Region         | Percent Population Coverage (%) |
|----------------|---------------------------------|
| World          | 99.68                           |
| East Asia      | 96.83                           |
| Northeast Asia | 99.39                           |
| South Asia     | 99.74                           |
| Southeast Asia | 94.53                           |
| Southwest Asia | 89.93                           |
| Europe         | 99.98                           |
| East Africa    | 99.98                           |
| West Africa    | 99.94                           |
| Central Africa | 99.88                           |
| North Africa   | 95.88                           |
| South Africa   | 32.1                            |
| West Indies    | 97.25                           |
| North America  | 100.0                           |

|                 |       |
|-----------------|-------|
| Central America | 99.5  |
| South America   | 99.99 |
| Oceania         | 99.54 |

**Supplementary Table S6.** Combined Class I and Class II Population Coverage

| <b>Region</b>   | <b>Percent Population Coverage (%)</b> |
|-----------------|----------------------------------------|
| <b>World</b>    | <b>99.49</b>                           |
| East Asia       | 99.11                                  |
| Northeast Asia  | 96.55                                  |
| South Asia      | 98.01                                  |
| Southeast Asia  | 96.15                                  |
| Southwest Asia  | 95.03                                  |
| Europe          | 99.91                                  |
| East Africa     | 95.19                                  |
| West Africa     | 97.49                                  |
| Central Africa  | 92.51                                  |
| North Africa    | 98.25                                  |
| South Africa    | 98.01                                  |
| West Indies     | 99.55                                  |
| North America   | 99.75                                  |
| Central America | 48.39                                  |
| South America   | 93.54                                  |
| Oceania         | 96.7                                   |

**Supplementary Table 7.** Attached in excel file.

**Supplementary Table 8.** Attached in excel file.

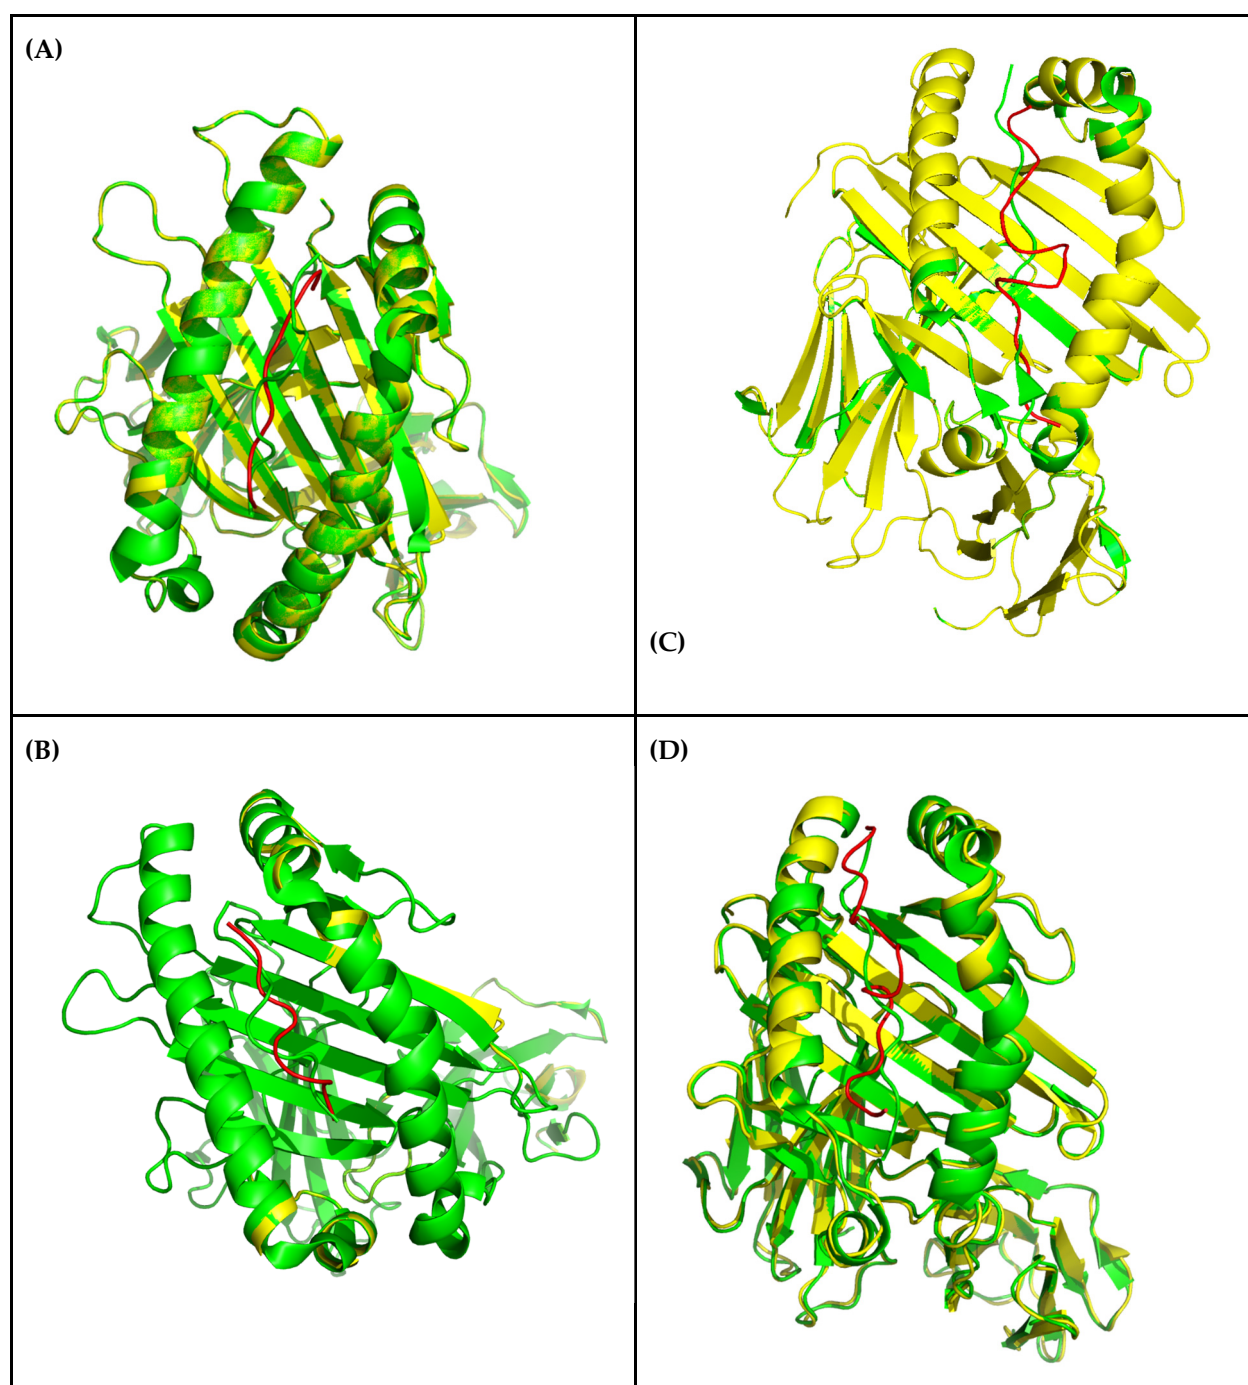

**Supplementary Figure S1.** *Superimposed models of epitope-MHC complexes with sample peptides. SDINAAIAF binding to MHC Class I molecule HLA-A\*01:01 superimposed with PDB ID: 6MPP (A). GKSDLIVHV binding to MHC Class I molecule HLA-A\*02:06 superimposed with PDB ID: 3OXR (B). GLARYIKNDSNYVVKGN binding to MHC Class II molecule HLA-DRB1\*04:01 superimposed with PDB ID: 5JLZ (C). FGLARYIKNDSNYVVK binding to MHC Class II molecule HLA-DRB3\*01:01 superimposed with PDB ID: 2Q6W (D).*
